# Supplementary material
Source: publisher figshare collection journal article supplement (https://acs.figshare.com/ndownloader/files/4044202)
Supplement: Supplementary file 1 [file 4044202]

# Carbon and Chlorine Isotope Fractionation During Microbial Degradation of Tetra- and Trichloroethene

## Supporting Information

*Charline Wiegert,<sup>1\*</sup> Manolis Mandalakis,<sup>2</sup> Tim Knowles,<sup>3+</sup> Paraskevi N. Polymenakou,<sup>2</sup>  
Christoph Aeppli,<sup>1°</sup> Jiřina Macháčková,<sup>4</sup> Henry Holmstrand,<sup>1</sup> Richard P. Evershed,<sup>3</sup> Richard D.  
Pancost<sup>3</sup> and Örjan Gustafsson<sup>1</sup>*

<sup>1</sup>Department of Applied Environmental Science (ITM), Stockholm University, 106 91  
Stockholm, Sweden

<sup>2</sup>Hellenic Centre for Marine Research (HCMR), 71003, Heraklion, Crete, Greece

<sup>3</sup>School of Chemistry, University of Bristol, Bristol BS8 1TS, United Kingdom

<sup>4</sup>AECOM CZ s.r.o., Liberec 460 11, Czech Republic

<sup>+</sup>current address: Mass Spec Analytical Ltd., Building 20F, Golf Course Lane, Bristol, BS34 7RP

<sup>°</sup>current address: Department of Marine Chemistry and Geochemistry, Woods Hole  
Oceanographic Institution, Woods Hole, MA 02543, USA

**Contents: 9 pages, 6 sections:**

|                                                                                                            |             |
|------------------------------------------------------------------------------------------------------------|-------------|
| Section S-1: Soil sampling: groundwater data                                                               | page S3     |
| Section S-2: Degradation experiments: concentrations analyses                                              | pages S4-S5 |
| Section S-3: Clone Library Construction                                                                    | pages S6-S7 |
| Section S-4: Clones identification results                                                                 | page S8     |
| Section S-5: Stable chlorine isotope analysis: notes on calibration                                        | page S9     |
| Section S-6: Concentrations of CEs and stable C and Cl isotopic data set                                   | page S10    |
| Section S-7: Comparison of $\epsilon$ and AKIE values for C and Cl isotopes in<br>different studies on CEs | page S11    |
| Section S-8: References                                                                                    | page S12-13 |

## S1. Soil sampling: groundwater data

**Table S1.** Terrain measurements, CEs concentrations and hydrogeochemical parameters at the groundwater wells located at the soil samplings areas.

| Soil                                                                                         | Z-32               | Z-53               | Z-54               | Z-65               |
|----------------------------------------------------------------------------------------------|--------------------|--------------------|--------------------|--------------------|
| <b>Borehole Groundwater</b>                                                                  | N-32               | N-53               | N-54               | N-65               |
| <b>Well depth [m below groundsurface]</b>                                                    | 2.44               | 2.78               | 3                  | 3.37               |
| <b>GWT [m below groundsurface]</b>                                                           | 0.91               | 1.33               | 0.9                | 0.60               |
| <b>pH</b>                                                                                    | 7                  | 6.3                | 6.3                | 6.7                |
| <b>Conductivity [<math>\mu\text{S}\cdot\text{cm}^{-1}</math>]</b>                            | 374                | 370                | 313                | 364                |
| <b>Temperature [<math>^{\circ}\text{C}</math>]</b>                                           | 9.3                | 8.8                | 8.5                | 9.4                |
| <b>Redox potential [mV]</b>                                                                  | -97                | -242               | -74                | -75                |
| <b>H<sub>2</sub>S [ppm]</b>                                                                  | 0.1                | 0.1                | 0.3                | <d.l. <sup>a</sup> |
| <b>CH<sub>4</sub></b>                                                                        | <d.l. <sup>a</sup> | <d.l. <sup>a</sup> | <d.l. <sup>a</sup> | <d.l. <sup>a</sup> |
| <b>O<sub>2</sub> [<math>\text{mg}\cdot\text{L}^{-1}</math>]</b>                              | 0.45               | 0.23               | 0.92               | 0.29               |
| <b>CE total [<math>\mu\text{mol}\cdot\text{L}^{-1}</math>]</b>                               | 22.48              | 82.45              | 95.63              | 0.02               |
| <b>PCE [<math>\mu\text{mol}\cdot\text{L}^{-1}</math>]</b>                                    | 8.56               | 25.27              | 46.13              | 0.02               |
| <b>TCE [<math>\mu\text{mol}\cdot\text{L}^{-1}</math>]</b>                                    | 3.74               | 28.31              | 36.15              | <0.004             |
| <b>1,2 cis DCE [<math>\mu\text{mol}\cdot\text{L}^{-1}</math>]</b>                            | 10.08              | 26.30              | 12.17              | <0.01              |
| <b>VC [<math>\mu\text{mol}\cdot\text{L}^{-1}</math>]</b>                                     | <0.06              | 2.21               | 1.05               | <0.06              |
| <b>Ethene [<math>\mu\text{mol}\cdot\text{L}^{-1}</math>]</b>                                 | <0.18              | 0.29               | <0.18              | <0.18              |
| <b>Sum of cations [<math>\text{mg}\cdot\text{L}^{-1}</math>]</b>                             | 85.8               | 75                 | 71.3               | 119                |
| <b>Sum anions [<math>\text{mg}\cdot\text{L}^{-1}</math>]</b>                                 | 239                | 185                | 189                | 290                |
| <b>NH<sub>4</sub><sup>3+</sup></b>                                                           | 0.071              | 0.176              | <0.05              | 28.4               |
| <b>Cl<sup>-</sup> [<math>\text{mg}\cdot\text{L}^{-1}</math>]</b>                             | 7.84               | 30.3               | 12.4               | 35.3               |
| <b>COD-Mn</b>                                                                                | 0.8                | 7.3                | 1.2                | 4.8                |
| <b>NO<sub>3</sub><sup>2-</sup> [<math>\text{mg}\cdot\text{L}^{-1}</math>]</b>                | <2                 | 10.7               | <2                 | <2                 |
| <b>NO<sub>2</sub><sup>-</sup> [<math>\text{mg}\cdot\text{L}^{-1}</math>]</b>                 | <0.005             | 0.0364             | 0.024              | <0.005             |
| <b>F<sup>-</sup> [<math>\text{mg}\cdot\text{L}^{-1}</math>]</b>                              | <0.2               | <0.2               | <0.2               | <0.2               |
| <b>PO<sub>4</sub><sup>3-</sup> [<math>\text{mg}\cdot\text{L}^{-1}</math>]</b>                | <0.04              | 0.065              | 0.044              | <0.04              |
| <b>SO<sub>4</sub><sup>2-</sup> [<math>\text{mg}\cdot\text{L}^{-1}</math>]</b>                | 33.3               | 48.9               | 21.2               | 67.7               |
| <b>HCO<sub>3</sub><sup>-</sup> [<math>\text{mg}\cdot\text{L}^{-1}</math>]</b>                | 198                | 95                 | 156                | 187                |
| <b>Dissolved substances (drying at 105°C)<br/>[<math>\text{mg}\cdot\text{L}^{-1}</math>]</b> | 218                | 222                | 164                | 230                |
| <b>Basic neutralisation capacity at pH 8.3 [<math>\text{mg}\cdot\text{L}^{-1}</math>]</b>    | 0.229              | 0.489              | 0.198              | 0.404              |
| <b>Acidic neutralisation capacity at pH 4.5 [<math>\text{mg}\cdot\text{L}^{-1}</math>]</b>   | 3.24               | 1.56               | 2.55               | 3.07               |
| <b>CO<sub>2</sub> total [<math>\text{mg}\cdot\text{L}^{-1}</math>]</b>                       | 152.67             | 90.08              | 120.89             | 152.72             |
| <b>CO<sub>2</sub> free [<math>\text{mg}\cdot\text{L}^{-1}</math>]</b>                        | 10.07              | 21.52              | 8.71               | 17.77              |
| <b>CO<sub>2</sub> agresive [<math>\text{mg}\cdot\text{L}^{-1}</math>]</b>                    | 0.65               | 17.89              | 3.37               | 7.24               |
| <b>Ca [<math>\text{mg}\cdot\text{L}^{-1}</math>]</b>                                         | 39.2               | 43.8               | 54.4               | 37.9               |
| <b>Fe [<math>\text{mg}\cdot\text{L}^{-1}</math>]</b>                                         | 1.7                | 4.7                | 1.1                | 3.5                |
| <b>K [<math>\text{mg}\cdot\text{L}^{-1}</math>]</b>                                          | 1.7                | 1.8                | 2.2                | 29.0               |
| <b>Mg [<math>\text{mg}\cdot\text{L}^{-1}</math>]</b>                                         | 6.6                | 4.3                | 4.8                | 4.4                |
| <b>Mn [<math>\text{mg}\cdot\text{L}^{-1}</math>]</b>                                         | 0.1                | 0.6                | <d.l. <sup>a</sup> | 6.2                |
| <b>Na [<math>\text{mg}\cdot\text{L}^{-1}</math>]</b>                                         | 6.3                | 19.6               | 8.7                | 12.7               |

<sup>a</sup>d.l. = detection limit

## **S2. Degradation experiments: concentrations analyses**

The analysis of PCE and TCE over the course of the incubation was performed as follow: volumes of 50  $\mu\text{L}$  of the culture were mixed to 100  $\mu\text{L}$  of ethyl acetate, containing 25 ppm ( $0.2 \text{ mmol}\cdot\text{L}^{-1}$ ) of isooctane as internal standard, into a polypropylene Eppendorf vial. The vial was shaken for 1 min on a vortex shaker, and allowed to stand for 30 s until phase separation. 1  $\mu\text{L}$  of the organic phase was then injected onto a HP 6890 GCMS. The injection port was kept at  $180^{\circ}\text{C}$  and operated in split mode with a split ratio of 20:1. The analytes were separated on a FS-Supreme-5ms capillary column (30 m, 0.25 mm i.d., 0.25  $\mu\text{m}$  film thickness) using helium as carrier gas at  $35 \text{ cm}\cdot\text{s}^{-1}$  constant flow rate. The GC oven was ramped from 34 to  $36^{\circ}\text{C}$  at  $0.5^{\circ}\text{C}\cdot\text{min}^{-1}$ , then to  $40^{\circ}\text{C}$  at  $3^{\circ}\text{C}\cdot\text{min}^{-1}$ , and finally to  $90^{\circ}\text{C}$  at  $40^{\circ}\text{C}\cdot\text{min}^{-1}$ , held for 0.5 min. The MS recorded the masses (isooctane:  $m/z$  57; TCE:  $m/z$  130, 132, 134 and 136; PCE:  $m/z$  164, 166, 168 and 170) using the positive electron impact ionization (EI+) in the single ion monitoring (SIM) mode.

The transformation of PCE and TCE to DCE and the stability of DCE over the course of time were also verified by a separate biodegradation experiment. A separate culture was inoculated with 10 mL of cell suspension from Z-32 primary culture and amended with a mixture of PCE and TCE to attain an initial concentration of 40 ppm, e.g. 0.24 and 0.30  $\text{mmol}\cdot\text{L}^{-1}$  for PCE and TCE respectively. In this experiment, headspace solid-phase microextraction (HS-SPME) coupled with GCMS was used in order to measure the concentrations of PCE, TCE and to perform a semi-quantitative analysis of DCE in the liquid culture (assuming that the response factor of DCE in full-scan mode was similar to that of PCE and TCE). The semi-quantitative analysis of DCE was feasible because HS-SPME is a solvent-free method of analysis. While the concentrations of PCE and TCE remained almost unchanged for the first 10 days, the analysis of

the same culture after 76 days of incubation indicated the complete loss of PCE and TCE and the formation of DCE. The presence of DCE in the culture medium after such a long incubation period provides strong evidence that the degradation of DCE was very slow, if it happens at all, leading to the accumulation of this metabolite in the culture. However, since SPME performance changed over the course of time and replacement of SPME fiber was needed after a limited number of injections, in-vial liquid-liquid microextraction was preferred to HS-SPME during the implementation of the final biodegradation experiments.

### **S3. Clone Library Construction and Sequence Analysis of the 16S rRNA genes**

PCR conditions were designed to minimize bias. Replicate PCR reactions, a low number of amplification cycles and an annealing temperature of 55°C were applied to avoid the preferential amplification of certain sequences that may introduce "artificial" diversity. For each sample, eight replicate PCR reactions of 20  $\mu$ L were amplified in a MJ Robocycler with initial denaturation at 94°C for 3 min followed by 25 cycles of 1 min at 94°C, 1 min annealing at 55°C, 3 min primer extension at 72°C, and a final extension at 72°C for 7 min. Each tube contained 1–4 ng of target DNA, PCR buffer (10 mM Tris–HCl at pH 9, 50 mM KCl, 0.1% Triton X-100, and 2 mM MgCl<sub>2</sub>), 100 nM of each primer, 200  $\mu$ M of each deoxyribonucleotide triphosphate and 0.25 U Taq DNA polymerase (Invitrogen, Carlsbad, CA, USA). PCR-negative controls (without DNA template) yielded no products (data not shown), whereas PCR-positive controls (with DNA template known to produce a specific product) were always successful during the experiments. All PCR products were pooled and concentrated in a centrifugal vacuum evaporator (Centrivac, Heraeus Instruments), followed by gel purification using the Qiaquick PCR purification kit (Qiagen, Valencia, CA, USA). The concentration of PCR products generated from the different sediment samples was determined by direct comparison to a Low DNA Mass Ladder (Invitrogen) using 2% agarose gel electrophoresis, ethidium bromide staining, and UV transillumination. For each sample, 5–10 ng of PCR product was cloned into the pCR4-TOPO vector and transformed into One shot TOP10 chemically competent cells of *Escherichia coli* using the TOPO TA Cloning kit (Version M) as recommended by the manufacturer (Invitrogen). At least 100 positive clones from each clone library (selected by blue and white screening) were transferred to 96-well plates and incubated overnight at 37°C in Luria–Bertani medium containing 50 mg kanamycin mL<sup>-1</sup>. Aliquots of the individual clones were (1) archived at –80°C

in 7% dimethyl sulfoxide or (2) washed by pelletizing cells in a 30-min centrifugation at 10,000 × g followed by supernatant removal by low-speed centrifugation (500 rpm) of inverted plates. Pelletized cells were resuspended in 30 mL sterile and UV-irradiated MQ-grade water. Cells were lysed by heating at 98°C for 10 min followed by agitation. The lysates were used (1:10 v/v) as templates in a PCR amplification of the insert using external (vector) primers M13f-20 (50-GTAAAACGACGGCCAG-30) and M13r (50-CAGGAAACAGCTATGAC-30; Invitrogen) to avoid co-amplification of *E. coli* host-cell DNA. PCR amplification was carried out for 25 cycles as described before and sent to the Macrogen company (Macrogen Europe, Amsterdam, the Netherlands) for sequencing with the primer 27F. A total of 226 sequences were successfully produced on an ABI 3700 sequencer (Applied Biosystems) using the BigDye terminator kit (v3.1 Applied Biosystems). This procedure generated high quality reads of 650-1050 bases. Using Chimera Check software included in the Ribosomal Database Project II (Michigan State University, East Lansing, MI, USA), none of the sequences could be identified as being chimeras. This was further confirmed during the submission of the sequences to the Global Database of Genbank where a quality check is always performed before their public release. All sequences were compared to GenBank entries using BLAST (Basic Local Alignment Search Tool, National Center for Biotechnology Information, Bethesda, MD, USA) in order to obtain preliminary phylogenetic affiliations of the clones.

#### S4. Clones identification results

**Table S2.** Clones identified from the PCE degradation experiments at three different time points, corresponding to 100%, 53% and 7.6% remaining fraction of PCE. The names in *italics* indicate culture strains. The identified operational taxonomic units (OTUs) are classified into five phyla, the *Actinobacteria*, the *Alpha*-, *Beta*- and *Gammaproteobacteria* and *Firmicutes*.

|                                | Access No. | clones No. | BLAST match (with accession No.)                            | Match (%) | Taxonomy                                       |
|--------------------------------|------------|------------|-------------------------------------------------------------|-----------|------------------------------------------------|
| 100% remaining fraction of PCE | KC109150   | 1          | Uncultured ncd2149a03c1 (JF180710)                          | 99        | Actinobacteria, Propionibacteriaceae           |
|                                | KC109147   | 1          | <i>Agrobacterium</i> sp. SDW052 (AF508209)                  | 99        | Alphaproteobacteria, Rhizobiaceae              |
|                                | KC109153   | 1          | Uncultured clone E158 (HQ828046)                            | 99        | Alphaproteobacteria, Sphingomonadaceae         |
|                                | KC109156   | 5          | <i>Sphingomonas rhizogenes</i> strain BW59UT1570 (JF276901) | 99        | Alphaproteobacteria, Sphingomonadaceae         |
|                                | KC109145   | 1          | Uncultured Ralstonia sp. IODP_305_1309D_13 (HQ379137)       | 100       | Betaproteobacteria Burkholderiaceae            |
|                                | KC109157   | 1          | <i>Ralstonia</i> sp. PH-S1 (JN543508)                       | 99        | Betaproteobacteria, Burkholderiaceae           |
|                                | KC109151   | 1          | Uncultured clone IS-58 (CQ339173)                           | 95        | Betaproteobacteria, Gallionellaceae            |
|                                | KC109152   | 1          | Uncultured clone kab227 (FJ936944)                          | 95        | Firmicutes, Clostridiales                      |
|                                | KC109154   | 1          | Uncultured clone ncd2292g09c1 (JF197169)                    | 99        | Firmicutes, Clostridiales                      |
|                                | KC109148   | 55         | <i>Clostridium</i> sp. strain DR7 (Y10030)                  | 98        | <b>Firmicutes, Clostridiales</b>               |
|                                | KC109155   | 1          | Uncultured clone ASC8 (JF357615)                            | 99        | Firmicutes, Lactobacillales, Carnobacteriaceae |
|                                | KC109158   | 1          | <i>Lactobacillus sakei</i> strain kimshi007 (JF781305)      | 98        | Firmicutes, Lactobacillaceae                   |
|                                | KC109146   | 1          | Uncultured Stenotrophomonas sp. F1jun.8 (GQ416874)          | 99        | Gammaproteobacteria, Xanthomonadaceae          |
|                                | KC109149   | 1          | Uncultured ncd1466a11c1 (JF126281)                          | 99        | unidentified                                   |
| 53% remaining fraction of PCE  | KC109185   | 2          | <i>Shingomonas rhizogenes</i> strain RSB-1 (AY962684)       | 99        | Alphaproteobacteria, Sphingomonadaceae         |
|                                | KC109177   | 1          | <i>Sphingomonas</i> sp. PPs-1 (FJ605417)                    | 99        | Alphaproteobacteria, Sphingomonadaceae         |
|                                | KC109183   | 1          | <i>Sphingomonas</i> sp. 070605-23_L09_7 (FJ626798)          | 99        | Alphaproteobacteria, Sphingomonadaceae         |
|                                | KC109184   | 1          | Uncultured clone E158 (HQ828046)                            | 99        | Alphaproteobacteria, Sphingomonadaceae         |
|                                | KC109178   | 1          | <i>Ralstonia</i> sp. Tianjin P1 (GU936705)                  | 99        | Betaproteobacteria Burkholderiaceae            |
|                                | KC109175   | 3          | <i>Achromobacter</i> sp. Zx6 (FJ463168)                     | 99        | Betaproteobacteria, Alcaligenaceae             |
|                                | KC109182   | 1          | <i>Ralstonia pickettii</i> isolate DiSca9 (EF195095)        | 99        | Betaproteobacteria, Burkholderiaceae           |
|                                | KC109181   | 1          | <i>Desulfovibrio idahonensis</i> strain CY2 (AJ582758)      | 99        | Deltaproteobacteria, Desulfovibrionaceae       |
|                                | KC109174   | 10         | <i>Desulfitobacterium aromaticivorans</i> UKTL (EU711071)   | 96        | <b>Firmicutes, Clostridiales</b>               |
|                                | KC109173   | 51         | <i>Clostridium</i> sp. strain DR7 (Y10030)                  | 99        | <b>Firmicutes, Clostridiales</b>               |
|                                | KC109176   | 1          | <i>Lactobacillus sakei</i> strain kimshi007 (JF781305)      | 99        | Firmicutes, Lactobacillaceae                   |
|                                | KC109180   | 3          | <i>Leuconostoc carnosum</i> strain NRIC 1722 (NR_040811)    | 99        | Firmicutes, Lactobacillales                    |
|                                | KC109179   | 1          | <i>Pelosinus</i> sp. UFO1 (DQ295866)                        | 97        | Firmicutes, Veillonellaceae                    |
|                                | KC109187   | 1          | <i>Pseudomonas stutzeri</i> strain LYS-86 (GQ402828)        | 99        | Gammaproteobacteria, Pseudomonadaceae          |
| 7.6% remaining fraction of PCE | KC109188   | 1          | <i>Pseudomonas</i> sp. BC046 (HQ105014)                     | 99        | Gammaproteobacteria, Pseudomonadaceae          |
|                                | KC109186   | 1          | Uncultured clone ncd2400h09c1 (JF208943)                    | 99        | unidentified                                   |
|                                | KC109164   | 1          | <i>Propionibacterium acnes</i> 266 (CP002409)               | 99        | Actinobacteria, Propionibacteriaceae           |
|                                | KC109163   | 1          | <i>Sphingomonas</i> sp. oral clone AV069 (AF385529)         | 99        | Alphaproteobacteria, Sphingomonadaceae         |
|                                | KC109167   | 2          | <i>Shingomonas rhizogenes</i> strain RSB-1 (AY962684)       | 99        | Alphaproteobacteria, Sphingomonadaceae         |
|                                | KC109169   | 1          | <i>Sphingomonas</i> sp. PPs-1 (FJ605417)                    | 99        | Alphaproteobacteria, Sphingomonadaceae         |
|                                | KC109165   | 4          | <i>Desulfovibrio idahonensis</i> strain CY2 (AJ582758)      | 99        | Deltaproteobacteria, Desulfovibrionaceae       |
|                                | KC109171   | 1          | <i>Geobacter hephaestius</i> (AY737507)                     | 95        | Deltaproteobacteria, Geobacteriaceae           |
|                                | KC109159   | 34         | <i>Desulfitobacterium aromaticivorans</i> UKTL (EU711071)   | 92        | <b>Firmicutes, Clostridiales</b>               |
|                                | KC109168   | 22         | <i>Clostridium</i> sp. strain DR7 (Y10030)                  | 97        | <b>Firmicutes, Clostridiales</b>               |
|                                | KC109170   | 2          | <i>Pseudomonas stutzeri</i> (JF970598)                      | 99        | Gammaproteobacteria, Pseudomonadaceae          |
|                                | KC109172   | 1          | Uncultured clone nbu544d04c1 (GQ032655)                     | 99        | unidentified                                   |
|                                | KC109162   | 2          | Uncultured spirochete clone ccsIm210 (AY133082)             | 99        | unidentified                                   |
|                                | KC109166   | 1          | Uncultured clone nbw1140g05c1 (CQ080894)                    | 99        | unidentified                                   |
|                                | KC109160   | 1          | Uncultured clone 29a08 (EF515483)                           | 98        | unidentified                                   |
|                                | KC109161   | 1          | Uncultured clone E37 (EU864479)                             | 96        | unidentified                                   |



## S5. Stable chlorine isotope analysis: notes on calibration

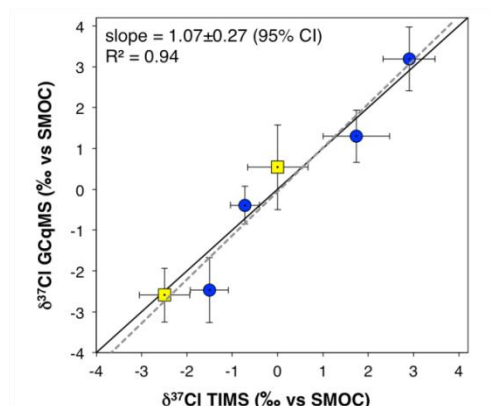

**Figure S1.** Trueness of  $\delta^{37}\text{Cl}$  of used analytical method. Shown are PCE (blue circles) and TCE (yellow squares) isotopic standards measured by an off-line reference method (TIMS, x-axis) and the GC/qMS method used for measuring  $\delta^{37}\text{Cl}$  of PCE and TCE samples described in the main text. The solid line represents the 1:1-line, the dashed line is a liner regression (slope =  $1.07 \pm 0.27$ ). This figure shows that a one-point calibration produced true results within the average analytical uncertainty of the used GC/qMS method of  $\pm 0.6\text{‰}$  (see main text).

**Table S3.** Used isotopic standards

|                      | TIMS<br>[‰ vs SMOC] | <i>n</i> | GC/qMS<br>[‰ vs SMOC] | <i>n</i> |
|----------------------|---------------------|----------|-----------------------|----------|
| PCE0 (Sigma-Aldrich) | -0.27±0.31          | 5        | (a)                   |          |
| PCE1                 | 2.90±0.58           | 3        | 3.19±0.78             | 10       |
| PCE5                 | 1.74±0.73           | 3        | 1.30±0.64             | 10       |
| PCE PPG              | -1.51±0.42          | 3        | -2.47±0.80            | 8        |
| PCE Merck            | -0.72±0.32          | 2        | -0.39±0.46            | 10       |
| TCE (Sigma-Aldrich)  | 2.90±0.38           | 2        | (a)                   |          |
| TCE PPG              | -2.49±0.55          | 3        | -2.59±0.66            | 9        |
| TCE Merck            | 0.00±0.67           | 3        | 0.54±1.04             | 9        |

(a) used as isotopic standard in the GCqMS method.

## S6. Concentrations of CEs and stable carbon and chlorine isotopic data set

**Table S4.** Remaining fraction, C and Cl isotope signatures for PCE (left) and TCE (right) degradation experiments, indicated with the precision of the measurements (see the Material and Method section in the main text). The  $\delta^{13}\text{C}$  values for TCE as a product of PCE degradation in the PCE experiments were also determined. Note that the  $\delta^{37}\text{Cl}$  signature measured for PCE5 was removed as an outlier (by applying the Cook's distance test),<sup>1,2</sup> and was therefore not used in the  $\epsilon_{\text{Cl}}$  calculations.

| PCE experiments |                      |                                       |                                    |                                       | TCE experiments |                      |                                   |                                    |
|-----------------|----------------------|---------------------------------------|------------------------------------|---------------------------------------|-----------------|----------------------|-----------------------------------|------------------------------------|
| Sample          | % Remaining Fraction | PCE $\delta^{13}\text{C}$ [‰ vs VPDB] | $\delta^{37}\text{Cl}$ [‰ vs SMOC] | TCE $\delta^{13}\text{C}$ [‰ vs VPDB] | Sample          | % Remaining Fraction | $\delta^{13}\text{C}$ [‰ vs VPDB] | $\delta^{37}\text{Cl}$ [‰ vs SMOC] |
| Control1        | 112.9±5.9            | -24.0±0.1                             | 1.1±0.9                            | n.d.                                  | Control1        | 98.9±3.3             | -28.1±0.1                         | 3.0±0.5                            |
| Control2        | 100.2±6.6            | -25.9±0.7                             | 0.9±0.7                            | n.d.                                  | Control2        | 99.1±3.9             | n.d.                              | 3.6±0.8                            |
| PCE1            | 100.8±5.1            | -25.8±0.1                             | 1.1±0.6                            | n.d.                                  | TCE1            | 97.2±2.7             | n.d.                              | n.d.                               |
| PCE2            | 26.8±1.4             | -16.1±0.2                             | 3.8±0.6                            | -19.6±0.2                             | TCE2            | 7.2±0.3              | 2.7±0.2                           | 12.9±0.8                           |
| PCE3            | 3.5±0.2              | -7.0±0.7                              | 7.5±0.8                            | -1.9±0.2                              | TCE3            | 5.2±0.1              | 0.3±0.6                           | 15.1±0.5                           |
| PCE4            | 19.4±0.9             | -15.5±0.6                             | 2.7±0.5                            | -17.5±0.6                             | TCE4            | 74.2±4.3             | -23.8±0.6                         | 5.3±0.6                            |
| PCE5            | 13.2±0.7             | -13.7±0.8                             | 1.4±0.6                            | -13.2±0.3                             | TCE5            | 29.4±1.2             | -14.0±0.4                         | 8.6±0.9                            |
| PCE6            | 7.1±0.4              | -8.0±0.2                              | 6.4±0.5                            | -7.9±0.3                              | TCE6            | 19.8±0.8             | -8.5±0.1                          | 10.7±0.4                           |
| PCE7            | 17.3±0.7             | -15.6±1.1                             | 5.6±0.9                            | -14.0±0.2                             | TCE7            | 13.3±0.3             | -5.8±0.6                          | 12.7±0.5                           |
| PCE8            | 71.3±3.3             | -21.9±0.1                             | 1.2±0.5                            | -26.7±0.8                             | TCE8            | 3.5±0.1              | -2.0±0.2                          | 16.6±0.5                           |
| PCE9            | 7.6±0.3              | -9.9±0.4                              | 6.6±0.5                            | -7.5±0.2                              | TCE9            | 9.4±0.2              | -3.6±0.2                          | 14.2±1.0                           |
| PCE10           | 53.1±2.2             | -20.9±0.5                             | 2.7±0.4                            | -25.1±0.6                             | TCE10           | 57.7±3.0             | -20.8±0.1                         | 7.1±0.5                            |
| PCE11           | 37.2±2.2             | -17.6±0.3                             | 3.1±0.6                            | -22.0±0.3                             | TCE11           | 100.2±3.4            | -26.9±0.0                         | 5.2±0.5                            |

## Section S7: Comparison of $\epsilon$ and AKIE values for C and Cl isotopes in different studies on CEs

**Table S5.** Comparison of  $\epsilon$  and AKIE values of CEs from different studies. The AKIE were compared as the ratio  $(AKIE_{Cl-1})/(AKIE_C-1)$ , as described in Elsner and Hunkeler (2008)<sup>3</sup> and applied in Abe et al. (2009).<sup>4</sup>

| Compound | Degradation pathway      | Type    | Experimental conditions | $\epsilon_C$ [‰ vs VPDB]<br>$\pm 95\%CI$ | $n_C$ | $x_C$            | $z_C$            | $AKIE_C$ | $\epsilon_{Cl}$ [‰ vs SMOC]<br>$\pm 95\%CI$ | $n_{Cl}$ | $x_{Cl}$ | $z_{Cl}$         | $AKIE_{Cl}$ | $\epsilon_{Cl}/\epsilon_C$      | $(AKIE_{Cl-1})/(AKIE_C-1)$   | Reference                                |
|----------|--------------------------|---------|-------------------------|------------------------------------------|-------|------------------|------------------|----------|---------------------------------------------|----------|----------|------------------|-------------|---------------------------------|------------------------------|------------------------------------------|
| PCE      | reductive dechlorination | biotic  | laboratory              | -5.6 $\pm$ 0.7                           | 2     | 2                | 2                | 1.0113   | -2.0 $\pm$ 0.5                              | 4        | 4        | 4                | 1.0081      | <b>0.35<math>\pm</math>0.11</b> | <b>0.71</b>                  | This study                               |
|          | reductive dechlorination | biotic  | field                   |                                          |       |                  |                  |          |                                             |          |          |                  |             | <b>0.42<math>\pm</math>0.39</b> |                              | Wiegert et al. (2012) <sup>5</sup>       |
|          | reductive dechlorination | biotic  | field                   |                                          |       |                  |                  |          |                                             |          |          |                  |             | <b>1.12<math>\pm</math>0.74</b> |                              | Wiegert et al. (2012) <sup>5</sup>       |
| TCE      | reductive dechlorination | biotic  | laboratory              | -8.8 $\pm$ 0.2                           | 2     | 1                | 1                | 1.0179   | -3.5 $\pm$ 0.5                              | 3        | 1        | 1                | 1.0106      | <b>0.37<math>\pm</math>0.11</b> | <b>0.59</b>                  | This study                               |
|          | reductive dechlorination | abiotic | laboratory              | -13.4 $\pm$ 1.7                          | 2     | 1                | 1                | 1.0275   | -2.6 $\pm$ 0.1                              | 3        | 1        | 1                | 1.0079      | <b>0.19<math>\pm</math>0.01</b> | <b>0.29</b>                  | Audi-Miro et al. (2012) <sup>6</sup>     |
|          | reductive dechlorination | abiotic | field                   | -12.40                                   | 2     | 1                | 1                | 1.0254   | -2.98                                       | 3        | 1        | 1                | 1.0090      | <b>0.24</b>                     | <b>0.35</b>                  | Lojkasek-Lima et al. (2012) <sup>7</sup> |
| cDCE     | reductive dechlorination | biotic  | laboratory              | -18.5                                    | 2     | 2                | 2/1 <sup>a</sup> | 1.0384   | -1.5                                        | 2        | 2        | 2/1 <sup>a</sup> | 1.0030      | <b>0.081</b>                    | <b>0.08</b>                  | Abe et al.(2009) <sup>4</sup>            |
|          | oxidation                | biotic  | laboratory              | -8.5                                     | 2     | 2                | 1                | 1.0086   | -0.3                                        | 2        | 2        | 1                | 1.0003      | <b>0.035</b>                    | <b>0.04</b>                  | Abe et al.(2009) <sup>4</sup>            |
|          | reductive dechlorination | abiotic | laboratory              | -18.7 $\pm$ 1.5                          | 2     | 2                | 2                | 1.0387   | -6.2 $\pm$ 0.8                              | 2        | 2        | 2                | 1.0126      | <b>0.33<math>\pm</math>0.20</b> | <b>0.32</b>                  | Audi-Miro et al. (2012) <sup>6</sup>     |
|          | reductive dechlorination | biotic  | field                   |                                          |       |                  |                  |          |                                             |          |          |                  |             | <b>0.48<math>\pm</math>0.05</b> |                              | Hunkeler et al (2011) <sup>8</sup>       |
| VC       | reductive dechlorination | biotic  | laboratory              | -25.2                                    | 2     | 1/2 <sup>b</sup> | 1                | 1.0531   | -1.8                                        | 1        | 1        | 1                | 1.0018      | <b>0.071</b>                    | <b>0.03/0.07<sup>a</sup></b> | Abe et al.(2009) <sup>4</sup>            |
|          | oxidation                | biotic  | laboratory              | -7.2                                     | 2     | 2                | 1                | 1.0073   | -0.3                                        | 1        | 1        | 1                | 1.0003      | <b>0.042</b>                    | <b>0.04</b>                  | Abe et al.(2009) <sup>4</sup>            |

<sup>a</sup> Note that z can be 2 or 1 for the reductive dechlorination of cDCE depending on the mechanism. However the resulting  $(AKIE_{Cl-1})/(AKIE_C-1)$  ratio remains unchanged (see Abe et al.<sup>4</sup> for details about the mechanisms)

<sup>b</sup> Similarly,  $x_C$  can be 2 or 1 for VC reductive dechlorination, resulting in different  $(AKIE_{Cl-1})/(AKIE_C-1)$  ratios (see Abe et al.<sup>4</sup> for details about the mechanisms)

## S8. References

- (1) Cook, R. D. Detection of Influential Observation in Linear Regression. *Technometrics* **1977**, *19*, 15–18.
- (2) Cook, R. D. Influential Observations in Linear Regression. *J. Am. Stat. Assoc.* **1979**, *74*, 169–174.
- (3) Elsner, M.; Hunkeler, D. Evaluating Chlorine Isotope Effects from Isotope Ratios and Mass Spectra of Polychlorinated Molecules. *Anal. Chem.* **2008**, *80*, 4731–4740.
- (4) Abe, Y.; Aravena, R.; Zopfi, J.; Parker, B.; Hunkeler, D. Evaluating the fate of chlorinated ethenes in streambed sediments by combining stable isotope, geochemical and microbial methods. *J. Contam. Hydrol.* **2009**, *107*, 10–21.
- (5) Wiegert, C.; Aeppli, C.; Knowles, T.; Holmstrand, H.; Evershed, R. P.; Pancost, R.; Macháčková, J.; Gustafsson, O. Dual carbon-chlorine stable isotope investigation of sources and fate of chlorinated ethenes in contaminated groundwater. *Environ. Sci. Technol.* **2012**.
- (6) Audí-Miró, C.; Cretnik, S.; Otero, N.; Palau, J.; Shouakar-Stash, O.; Soler, A.; Elsner, M. Cl and C isotope analysis to assess the effectiveness of chlorinated ethene degradation by zero-valent iron: Evidence from dual element and product isotope values. *Spec. Issue Devoted 9th Int. Symp. Appl. Isot. Geochem. Aig9 Tarrag. Spain Sept. 2011* **2013**, *32*, 175–183.
- (7) Lojkasek-Lima, P.; Aravena, R.; Shouakar-Stash, O.; Frape, S. K.; Marchesi, M.; Fiorenza, S.; Vogan, J. Evaluating TCE Abiotic and Biotic Degradation Pathways in a Permeable Reactive Barrier Using Compound Specific Isotope Analysis. *Groundw. Monit. Remediat.* **2012**, *32*, 53–62.

- (8) Hunkeler, D.; Abe, Y.; Broholm, M. M.; Jeannotat, S.; Westergaard, C.; Jacobsen, C. S.; Aravena, R.; Bjerg, P. L. Assessing chlorinated ethene degradation in a large scale contaminant plume by dual carbon–chlorine isotope analysis and quantitative PCR. *J. Contam. Hydrol.* **2011**, *119*, 69–79.
